# Supplementary material for: Preparation of a highly active MoS2/TiO2 composite for photocatalytic oxidation of nitrite under solar irradiation
Source: Royal Society of Chemistry journal article supplement (doi:10.1039/d1nj00707f), 2021-01-01
Supplement: d1nj00707f1.pdf [file d1nj00707f1.pdf]

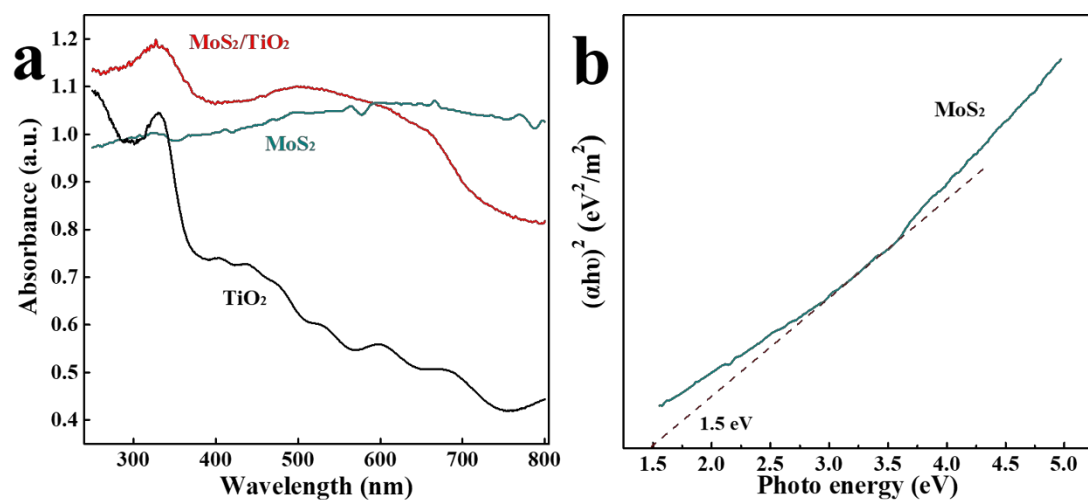

Fig.S1. (a) UV-vis spectra. (b) The plot analysis of optical band gap of pure MoS<sub>2</sub>

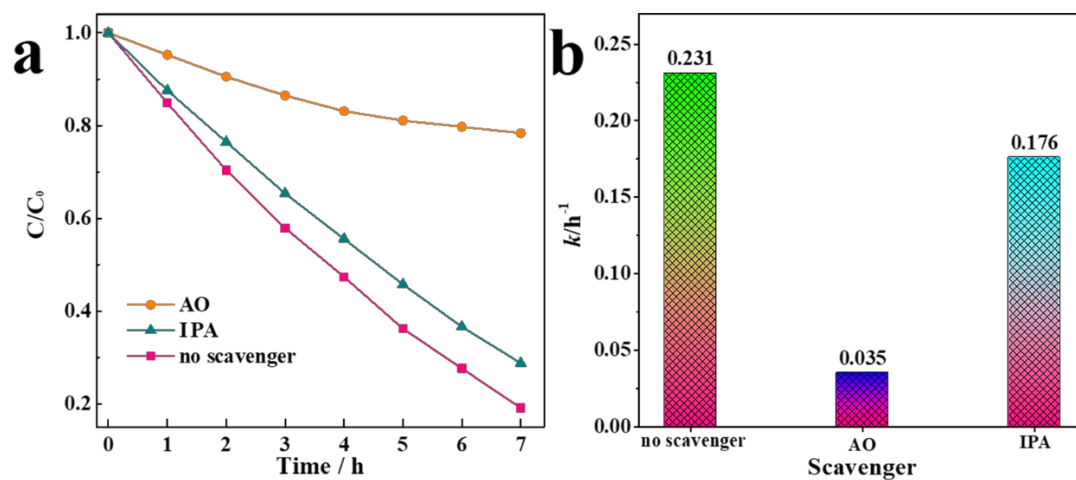

Fig.S2. (a) Effect of different active species on  $\text{NO}_2^-$  oxidation efficiency. (b) Kinetic reaction rate  $k$  of the corresponding catalytic process with different active species

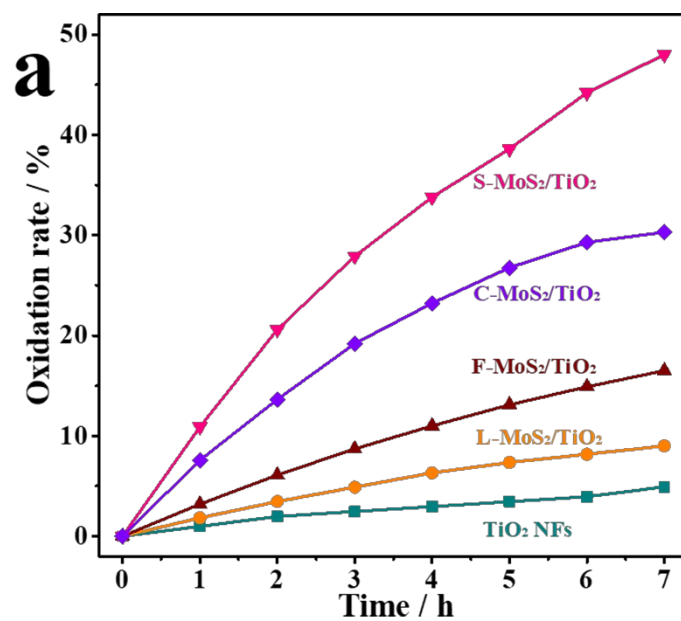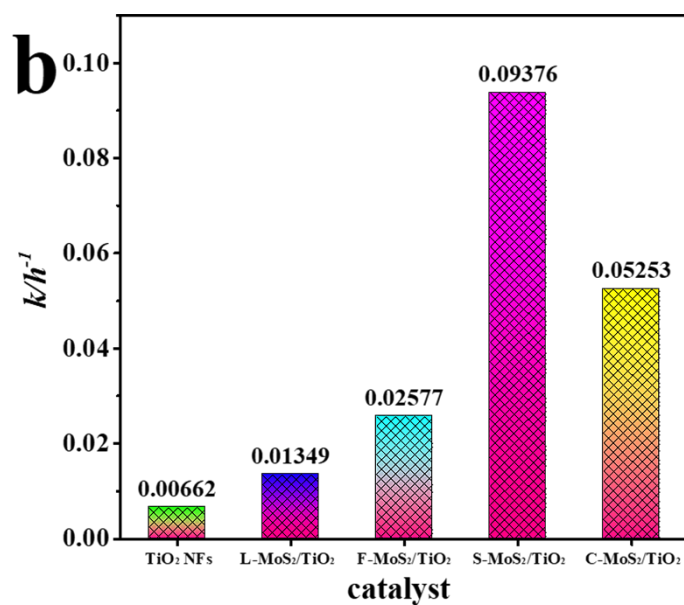

Fig.S3. (a) Curves of  $\text{NO}_2^-$  degradation rate over time under visible light by different catalysts. (b) Kinetic reaction rate  $k$  of the corresponding catalytic process.

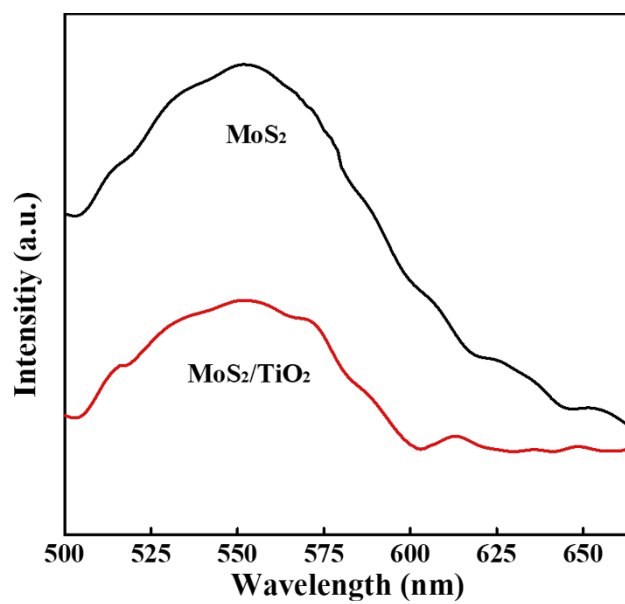

Fig. S4. PL spectra of pristine TiO<sub>2</sub> NFs and MoS<sub>2</sub>/TiO<sub>2</sub> composites under excitation light wavelength of 500 nm.

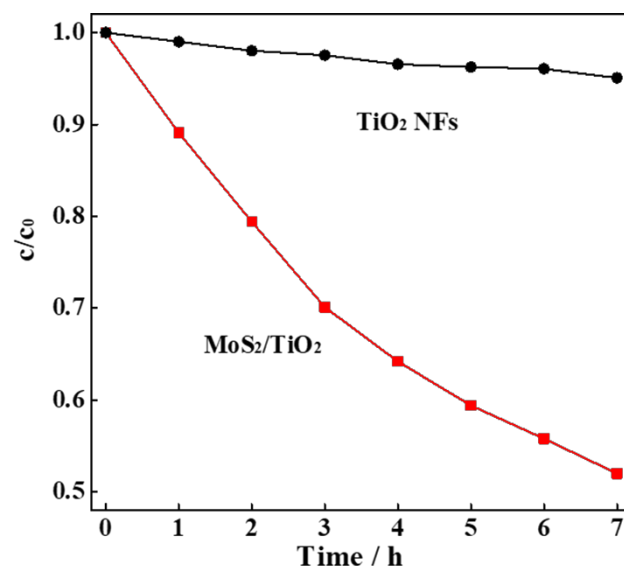

Fig. S5. Oxidation rate of  $\text{NO}_2^-$  by  $\text{TiO}_2$  NFS and  $\text{MoS}_2/\text{TiO}_2$  composite under visible light ( $\lambda > 400$  nm).
